# Supplementary material for: A multimodal vision foundation model for clinical dermatology
Source: Springer Nature journal article supplement (doi:10.1038/s41591-025-03747-y), 2025-06-06
Supplement: MOESM1 [file 41591_2025_3747_MOESM1_ESM.pdf]

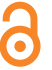

---

# A multimodal vision foundation model for clinical dermatology

---

In the format provided by the authors and unedited

| Model                      | ISIC19b      | HAM_c        | BCN20000     | PAD          | Derm7pt_c    | Dermnet      | MCSI         | TBP_solar    | Average      |
|----------------------------|--------------|--------------|--------------|--------------|--------------|--------------|--------------|--------------|--------------|
| CLIP_base (teacher)        | 88.07        | 96.13        | 91.09        | 91.03        | 77.10        | 89.92        | 99.87        | 94.29        | 90.94        |
| CLIP_large (teacher)       | 89.44        | 96.34        | 93.12        | 92.58        | 80.18        | 90.88        | 99.85        | 95.31        | 92.21        |
| MONET_large (teacher)      | 89.05        | 96.65        | 94.03        | 92.55        | 75.17        | 91.41        | 99.85        | 95.59        | 91.79        |
| BIOMED_CLIP_base (teacher) | 74.71        | 82.59        | 80.82        | 88.16        | 60.95        | 85.60        | 97.12        | 80.29        | 81.28        |
| Base model                 | 86.69        | 96.36        | 92.75        | 94.20        | 82.91        | 93.33        | <b>99.88</b> | 95.15        | 92.66        |
| + BiomedCLIP_base          | 86.63        | 97.06        | 93.27        | 91.59        | 82.09        | 90.96        | 98.59        | 95.29        | 91.94        |
| + CLIP_base                | 88.78        | 97.21        | 93.55        | 92.42        | 79.50        | 93.13        | 99.87        | 95.63        | 92.51        |
| + CLIP_large               | <b>89.26</b> | <b>98.03</b> | <b>95.60</b> | <b>94.61</b> | <b>87.85</b> | <b>94.97</b> | <b>99.88</b> | <b>96.80</b> | <b>94.63</b> |

Supplementary Data Table 1: **Ablation on target representation (teacher models) across various dermatology datasets.** Models include CLIP variants, MONET, BIOMED\_CLIP, and PanDerm with different pretraining strategies. Metrics represent accuracy percentages. The best-performing model for each dataset is bolded and highlighted. Datasets vary in modality and size: ISIC19b, HAM\_c, BCN20000 (derm, 20k/10k/12k), PAD, Derm7pt\_c, Dermnet, MCSI (clinic, 2k/839/19k/400), TBP\_solar (TBP, 6k). It shows that CLIP-large pretrained on the natural domain can outperform biomedical-specific CLIP (BiomedCLIP) and dermatology-specific CLIP (MONET). This can be attributed to the limited data scale of skin images in medical domain CLIP models. Thus, CLIP-large remains the best teacher model for creating target representations for masked image modeling in dermatology. When incorporating CLIP-large as the teacher model, it significantly improved the base model (+ 1.97 on average) and also outperformed the teacher model itself (+2.42 on average).

| Model                  | HAM_c        | BCN20000     | PAD          | Derm7pt_c    | Dermnet      | MCSI         | TBP_solar    | Average      | Training time |
|------------------------|--------------|--------------|--------------|--------------|--------------|--------------|--------------|--------------|---------------|
| PanDerm (FT)           | <b>98.03</b> | <b>97.65</b> | 93.59        | <b>86.68</b> | <b>95.21</b> | 98.10        | <b>96.38</b> | <b>95.09</b> | ~ 80 min      |
| PanDerm (LP)           | 97.40        | 95.19        | <b>94.50</b> | 84.94        | 94.36        | <b>99.53</b> | 96.09        | 94.57        | ~ 5 min       |
| Performance difference | -0.63        | -2.46        | +0.91        | -1.74        | -0.85        | +1.43        | -0.29        | -0.52        | -75 min       |
| Modalities             | derm         | derm         | clinic       | clinic       | clinic       | clinic       | TBP          |              |               |
| Size                   | 10k          | 12k          | 2k           | 839          | 19k          | 400          | 6k           |              |               |
| #class                 | 7            | 9            | 6            | 2            | 23           | 4            | 3            |              |               |

Supplementary Data Table 2: **Performance comparison of PanDerm (FT) and PanDerm (LP) models across various dermatology datasets.** FT: Fine-Tuning, LP: Linear Probing. Metrics represent accuracy percentages. The best-performing model for each dataset is bolded. The performance difference row shows the change from FT to LP, with positive values indicating LP outperformed FT. Datasets vary in modality, size, and number of classes as shown in the bottom rows. It shows that PanDerm using simple linear probing can perform comparably with expensive full-parameter finetuning. This suggests that PanDerm’s features are already well-suited for diverse downstream multimodal skin-related tasks without requiring further training. All models are trained and evaluated using 4 × NVIDIA RTX 6000Ada GPUs.

| Model                    | Accuracy      | Weighted F1   |
|--------------------------|---------------|---------------|
| BioMedGPT (finetune)     | 0.7394        | 0.7740        |
| BioMedGPT (Linear probe) | 0.7149        | 0.6816        |
| PanDerm (Finetune)       | <b>0.8538</b> | <b>0.8538</b> |
| PanDerm (Linear probe)   | 0.8306        | 0.8252        |

Supplementary Data Table 3: **Performance comparison between BioMedGPT and PanDerm models on HAM10000.** Models are evaluated using both fine-tuning and linear probing (LP) approaches. Performance is reported using Accuracy and Weighted F1 score metrics. Best performance for each metric is bolded.

| Dataset  | Model       | W_F1                       | AUROC                      | BACC                       | AUPR                       |
|----------|-------------|----------------------------|----------------------------|----------------------------|----------------------------|
| PAD      | SL_Imagenet | 0.678 (0.636-0.720)***     | 0.887 (0.864-0.911)***     | 0.614 (0.540-0.688)        | 0.759 (0.718-0.799)***     |
|          | DINOV2      | 0.702 (0.662-0.743)**      | 0.885 (0.861-0.908)***     | 0.607 (0.535-0.679)*       | 0.753 (0.710-0.796)***     |
|          | SwaVDerm    | 0.656 (0.614-0.698)***     | 0.865 (0.838-0.891)***     | 0.534 (0.469-0.599)**      | 0.718 (0.675-0.761)***     |
|          | PanDerm     | <b>0.768 (0.732-0.805)</b> | <b>0.935 (0.919-0.951)</b> | <b>0.694 (0.624-0.764)</b> | <b>0.849 (0.817-0.880)</b> |
| HAM10000 | SL_Imagenet | 0.879 (0.863-0.895)***     | 0.970 (0.962-0.978)***     | 0.653 (0.586-0.720)***     | 0.922 (0.909-0.936)***     |
|          | DINOV2      | 0.883 (0.868-0.899)***     | 0.964 (0.954-0.974)***     | 0.701 (0.637-0.765)***     | 0.916 (0.901-0.931)***     |
|          | SwaVDerm    | 0.865 (0.848-0.883)***     | 0.967 (0.959-0.975)***     | 0.592 (0.521-0.663)***     | 0.910 (0.896-0.924)***     |
|          | PanDerm     | <b>0.926 (0.912-0.940)</b> | <b>0.988 (0.984-0.992)</b> | <b>0.807 (0.756-0.859)</b> | <b>0.959 (0.949-0.970)</b> |
| DermC    | SL_Imagenet | 0.756 (0.694-0.818)        | 0.797 (0.726-0.867)*       | 0.700 (0.631-0.770)        | 0.683 (0.575-0.791)*       |
|          | DINOV2      | 0.763 (0.702-0.824)        | 0.796 (0.719-0.872)**      | 0.717 (0.649-0.786)        | 0.735 (0.644-0.826)        |
|          | SwaVDerm    | 0.750 (0.687-0.814)        | 0.768 (0.690-0.846)**      | 0.700 (0.628-0.771)        | 0.658 (0.543-0.774)**      |
|          | PanDerm     | <b>0.788 (0.728-0.847)</b> | <b>0.876 (0.824-0.928)</b> | <b>0.740 (0.672-0.808)</b> | <b>0.798 (0.710-0.886)</b> |
| BCN20000 | SL_Imagenet | 0.698 (0.673-0.722)***     | 0.914 (0.903-0.925)***     | 0.592 (0.537-0.647)*       | 0.754 (0.728-0.779)***     |
|          | DINOV2      | 0.724 (0.701-0.747)***     | 0.927 (0.917-0.938)***     | 0.575 (0.518-0.632)**      | 0.787 (0.765-0.810)***     |
|          | SwaVDerm    | 0.696 (0.672-0.720)***     | 0.908 (0.897-0.919)***     | 0.499 (0.444-0.554)***     | 0.742 (0.717-0.768)***     |
|          | PanDerm     | <b>0.772 (0.750-0.795)</b> | <b>0.952 (0.944-0.960)</b> | <b>0.662 (0.616-0.708)</b> | <b>0.846 (0.825-0.867)</b> |
| DDI      | SL_Imagenet | 0.773 (0.710-0.836)        | 0.743 (0.639-0.847)**      | 0.655 (0.554-0.755)        | 0.412 (0.283-0.541)*       |
|          | DINOV2      | 0.756 (0.695-0.816)        | 0.749 (0.649-0.849)*       | 0.612 (0.518-0.706)*       | 0.456 (0.308-0.605)        |
|          | SwaVDerm    | 0.730 (0.668-0.792)        | 0.747 (0.650-0.845)**      | 0.571 (0.483-0.660)**      | 0.421 (0.294-0.548)*       |
|          | PanDerm     | <b>0.790 (0.728-0.852)</b> | <b>0.843 (0.768-0.918)</b> | <b>0.722 (0.624-0.819)</b> | <b>0.551 (0.397-0.705)</b> |
| HIBA     | SL_Imagenet | 0.881 (0.850-0.911)**      | 0.881 (0.823-0.940)**      | 0.685 (0.612-0.759)**      | 0.638 (0.511-0.765)*       |
|          | DINOV2      | 0.884 (0.852-0.915)***     | 0.873 (0.816-0.930)**      | 0.737 (0.663-0.812)***     | 0.616 (0.486-0.747)*       |
|          | SwaVDerm    | 0.865 (0.834-0.895)***     | 0.854 (0.799-0.910)***     | 0.657 (0.585-0.729)***     | 0.519 (0.387-0.651)***     |
|          | PanDerm     | <b>0.928 (0.901-0.954)</b> | <b>0.948 (0.922-0.975)</b> | <b>0.810 (0.740-0.880)</b> | <b>0.765 (0.652-0.878)</b> |
| MSKCC    | SL_Imagenet | 0.712 (0.691-0.732)**      | 0.733 (0.708-0.758)**      | 0.635 (0.611-0.660)        | 0.482 (0.444-0.521)***     |
|          | DINOV2      | 0.707 (0.687-0.728)**      | 0.722 (0.695-0.748)**      | <b>0.662 (0.636-0.689)</b> | 0.497 (0.457-0.537)***     |
|          | SwaVDerm    | 0.715 (0.696-0.733)*       | 0.720 (0.692-0.748)***     | 0.617 (0.593-0.641)**      | 0.515 (0.474-0.556)***     |
|          | PanDerm     | <b>0.737 (0.718-0.756)</b> | <b>0.761 (0.735-0.787)</b> | 0.653 (0.628-0.677)        | <b>0.589 (0.548-0.630)</b> |
| PATCH16  | SL_Imagenet | 0.873 (0.867-0.878)***     | 0.992 (0.991-0.992)***     | 0.834 (0.808-0.859)***     | 0.936 (0.932-0.941)***     |
|          | DINOV2      | 0.892 (0.886-0.897)***     | 0.993 (0.992-0.994)**      | 0.820 (0.813-0.828)***     | 0.945 (0.941-0.949)        |
|          | SwaVDerm    | 0.816 (0.809-0.822)***     | 0.984 (0.983-0.985)***     | 0.742 (0.734-0.751)***     | 0.891 (0.885-0.896)***     |
|          | PanDerm     | <b>0.903 (0.898-0.908)</b> | <b>0.994 (0.993-0.994)</b> | <b>0.879 (0.854-0.903)</b> | <b>0.946 (0.943-0.950)</b> |
| ISIC2024 | SL_Imagenet | 0.877 (0.873-0.877)***     | 0.849 (0.765-0.917)***     | 0.727 (0.635-0.811)**      | 0.860 (0.835-0.885)***     |
|          | DINOV2      | 0.851 (0.849-0.853)***     | 0.827 (0.745-0.870)***     | 0.682 (0.606-0.752)***     | 0.850 (0.825-0.875)***     |
|          | SwaVDerm    | 0.869 (0.866-0.871)***     | 0.852 (0.789-0.877)***     | 0.689 (0.599-0.774)***     | 0.835 (0.810-0.860)***     |
|          | PanDerm     | <b>0.929 (0.927-0.931)</b> | <b>0.893 (0.839-0.940)</b> | <b>0.799 (0.718-0.873)</b> | <b>0.915 (0.895-0.935)</b> |
| WSI      | SL_Imagenet | 0.945 (0.925-0.965)        | 0.989 (0.977-1.002)        | 0.937 (0.906-0.960)***     | 0.941 (0.930-0.947)***     |
|          | DINOV2      | 0.947 (0.919-0.974)        | 0.988 (0.976-1.000)        | 0.932 (0.910-0.945)***     | 0.930 (0.906-0.956)***     |
|          | SwaVDerm    | 0.932 (0.914-0.951)        | 0.989 (0.978-1.000)*       | 0.893 (0.882-0.910)***     | 0.920 (0.905-0.935)***     |
|          | PanDerm     | <b>0.953 (0.930-0.975)</b> | <b>0.994 (0.986-1.001)</b> | <b>0.976 (0.963-0.994)</b> | <b>0.981 (0.972-0.993)</b> |

Supplementary Data Table 4: **Skin cancer diagnosis performance of different models across multinational datasets.** Models include SL\_Imagenet (supervised learning on ImageNet), DINOv2, SwaVDerm, and PanDerm. Performance is reported using Weighted F1 score (W\_F1), Area Under the Receiver Operating Characteristic curve (AUROC), Balanced Accuracy (BACC), and Area Under the Precision-Recall curve (AUPR). Further details on the experimental setup, datasets, and metrics are provided in **Methods**. Best-performing model for each metric and dataset is bolded and highlighted. 95% CI is included in parentheses. Significance levels for comparisons with the best model: \* $p < 0.05$ , \*\* $p < 0.01$ , \*\*\* $p < 0.001$ . P-values calculated using a two-sided t-test.

| Percent | Model       | W_F1                       | AUROC                      | BACC                       | AUPR                       |
|---------|-------------|----------------------------|----------------------------|----------------------------|----------------------------|
| 5%      | SL_ImageNet | 0.792 (0.774-0.809)***     | 0.919 (0.905-0.934)***     | 0.337 (0.294-0.379)***     | 0.853 (0.838-0.867)***     |
|         | DINOv2      | 0.803 (0.786-0.821)***     | 0.928 (0.913-0.943)***     | 0.380 (0.322-0.437)***     | 0.852 (0.837-0.867)***     |
|         | SwAVDerm    | 0.793 (0.776-0.810)***     | 0.917 (0.901-0.932)***     | 0.322 (0.288-0.356)***     | 0.841 (0.826-0.855)***     |
|         | PanDerm     | <b>0.851 (0.834-0.868)</b> | <b>0.960 (0.950-0.970)</b> | <b>0.524 (0.459-0.589)</b> | <b>0.902 (0.888-0.915)</b> |
| 10%     | SL_ImageNet | 0.816 (0.797-0.834)***     | 0.937 (0.925-0.949)***     | 0.414 (0.365-0.464)***     | 0.871 (0.856-0.886)***     |
|         | DINOv2      | 0.824 (0.807-0.841)***     | 0.939 (0.926-0.953)***     | 0.448 (0.389-0.506)***     | 0.871 (0.856-0.886)***     |
|         | SwAVDerm    | 0.811 (0.794-0.827)***     | 0.923 (0.907-0.938)***     | 0.365 (0.329-0.402)***     | 0.854 (0.840-0.869)***     |
|         | PanDerm     | <b>0.872 (0.855-0.888)</b> | <b>0.969 (0.961-0.978)</b> | <b>0.618 (0.550-0.686)</b> | <b>0.923 (0.910-0.936)</b> |
| 20%     | SL_ImageNet | 0.838 (0.820-0.855)***     | 0.940 (0.928-0.952)***     | 0.506 (0.439-0.573)***     | 0.880 (0.865-0.896)***     |
|         | DINOv2      | 0.839 (0.822-0.856)***     | 0.947 (0.935-0.959)***     | 0.534 (0.467-0.600)**      | 0.884 (0.869-0.899)***     |
|         | SwAVDerm    | 0.825 (0.809-0.842)***     | 0.931 (0.916-0.946)***     | 0.408 (0.357-0.460)***     | 0.871 (0.855-0.886)***     |
|         | PanDerm     | <b>0.889 (0.873-0.905)</b> | <b>0.975 (0.968-0.982)</b> | <b>0.665 (0.594-0.736)</b> | <b>0.935 (0.924-0.947)</b> |
| 30%     | SL_ImageNet | 0.837 (0.820-0.855)***     | 0.945 (0.933-0.956)***     | 0.505 (0.438-0.571)***     | 0.883 (0.867-0.899)***     |
|         | DINOv2      | 0.848 (0.831-0.864)***     | 0.951 (0.939-0.962)***     | 0.559 (0.488-0.630)**      | 0.894 (0.880-0.909)***     |
|         | SwAVDerm    | 0.839 (0.822-0.857)***     | 0.939 (0.925-0.953)***     | 0.493 (0.428-0.558)***     | 0.879 (0.864-0.895)***     |
|         | PanDerm     | <b>0.895 (0.880-0.911)</b> | <b>0.979 (0.973-0.985)</b> | <b>0.721 (0.653-0.788)</b> | <b>0.943 (0.931-0.954)</b> |
| 50%     | SL_ImageNet | 0.855 (0.838-0.872)***     | 0.957 (0.947-0.967)***     | 0.565 (0.492-0.638)***     | 0.904 (0.889-0.919)***     |
|         | DINOv2      | 0.855 (0.838-0.872)***     | 0.953 (0.940-0.965)***     | 0.597 (0.529-0.664)**      | 0.902 (0.888-0.916)***     |
|         | SwAVDerm    | 0.854 (0.836-0.871)***     | 0.953 (0.941-0.964)***     | 0.557 (0.489-0.626)***     | 0.893 (0.878-0.908)***     |
|         | PanDerm     | <b>0.909 (0.894-0.924)</b> | <b>0.981 (0.976-0.987)</b> | <b>0.749 (0.685-0.814)</b> | <b>0.950 (0.939-0.961)</b> |
| 100%    | SL_ImageNet | 0.872 (0.856-0.888)***     | 0.967 (0.958-0.976)***     | 0.652 (0.584-0.720)***     | 0.919 (0.905-0.934)***     |
|         | DINOv2      | 0.876 (0.860-0.892)***     | 0.962 (0.951-0.972)***     | 0.686 (0.621-0.751)**      | 0.913 (0.898-0.928)***     |
|         | SwAVDerm    | 0.864 (0.847-0.881)***     | 0.963 (0.954-0.972)***     | 0.592 (0.520-0.664)***     | 0.904 (0.889-0.919)***     |
|         | PanDerm     | <b>0.922 (0.908-0.936)</b> | <b>0.988 (0.984-0.992)</b> | <b>0.797 (0.744-0.850)</b> | <b>0.959 (0.949-0.969)</b> |

Supplementary Data Table 5: **Label efficiency generalization performance for dermoscopic image-based skin cancer diagnosis based on HAM\_clean dataset.** Metrics: W\_F1 (Weighted F1), AUROC, BACC (Balanced Accuracy), AUPR (Area Under Precision-Recall Curve). The best model for each setting is bolded. 95% CI in parentheses. \* $p < 0.05$ , \*\* $p < 0.01$ , \*\*\* $p < 0.001$  compared to PanDerm. P-values calculated using a two-sided t-test.

| Percent | Model       | W_F1                       | AUROC                      | BACC                       | AUPR                       |
|---------|-------------|----------------------------|----------------------------|----------------------------|----------------------------|
| 5%      | SL_ImageNet | 0.543 (0.518-0.568)***     | 0.815 (0.799-0.831)***     | 0.305 (0.272-0.338)        | 0.567 (0.539-0.594)***     |
|         | DINOv2      | 0.565 (0.541-0.590)        | 0.840 (0.824-0.855)**      | 0.305 (0.278-0.332)        | 0.616 (0.589-0.642)        |
|         | SwAVDerm    | 0.541 (0.517-0.565)***     | 0.809 (0.793-0.825)***     | 0.272 (0.248-0.297)**      | 0.565 (0.538-0.593)***     |
|         | PanDerm     | <b>0.586 (0.563-0.609)</b> | <b>0.859 (0.846-0.872)</b> | <b>0.304 (0.278-0.330)</b> | <b>0.628 (0.601-0.654)</b> |
| 10%     | SL_ImageNet | 0.561 (0.536-0.586)***     | 0.837 (0.822-0.851)***     | 0.332 (0.295-0.369)***     | 0.599 (0.569-0.628)***     |
|         | DINOv2      | 0.602 (0.577-0.627)**      | 0.855 (0.840-0.870)***     | 0.373 (0.329-0.417)*       | 0.642 (0.614-0.671)***     |
|         | SwAVDerm    | 0.571 (0.546-0.596)***     | 0.833 (0.818-0.848)***     | 0.321 (0.288-0.355)***     | 0.590 (0.562-0.618)***     |
|         | PanDerm     | <b>0.650 (0.626-0.675)</b> | <b>0.890 (0.877-0.903)</b> | <b>0.417 (0.374-0.459)</b> | <b>0.704 (0.678-0.731)</b> |
| 20%     | SL_ImageNet | 0.612 (0.587-0.638)***     | 0.862 (0.849-0.876)***     | 0.392 (0.346-0.438)*       | 0.647 (0.619-0.675)***     |
|         | DINOv2      | 0.614 (0.589-0.638)***     | 0.872 (0.859-0.886)***     | 0.374 (0.330-0.418)**      | 0.667 (0.638-0.695)***     |
|         | SwAVDerm    | 0.591 (0.566-0.615)***     | 0.851 (0.836-0.865)***     | 0.357 (0.318-0.396)**      | 0.629 (0.601-0.656)***     |
|         | PanDerm     | <b>0.681 (0.658-0.704)</b> | <b>0.910 (0.899-0.921)</b> | <b>0.434 (0.395-0.473)</b> | <b>0.735 (0.708-0.761)</b> |
| 30%     | SL_ImageNet | 0.613 (0.587-0.639)***     | 0.866 (0.853-0.880)***     | 0.426 (0.373-0.478)*       | 0.663 (0.636-0.690)***     |
|         | DINOv2      | 0.648 (0.624-0.672)***     | 0.880 (0.867-0.894)***     | 0.435 (0.381-0.489)*       | 0.687 (0.660-0.713)***     |
|         | SwAVDerm    | 0.610 (0.586-0.635)***     | 0.861 (0.847-0.875)***     | 0.343 (0.315-0.372)***     | 0.639 (0.611-0.668)***     |
|         | PanDerm     | <b>0.703 (0.680-0.727)</b> | <b>0.923 (0.913-0.933)</b> | <b>0.509 (0.455-0.563)</b> | <b>0.766 (0.742-0.790)</b> |
| 50%     | SL_ImageNet | 0.649 (0.624-0.674)***     | 0.888 (0.875-0.901)***     | 0.495 (0.435-0.556)*       | 0.698 (0.671-0.726)***     |
|         | DINOv2      | 0.660 (0.636-0.684)***     | 0.894 (0.883-0.906)***     | 0.478 (0.424-0.532)*       | 0.720 (0.695-0.746)***     |
|         | SwAVDerm    | 0.628 (0.602-0.653)***     | 0.880 (0.867-0.893)***     | 0.396 (0.352-0.439)***     | 0.685 (0.657-0.713)***     |
|         | PanDerm     | <b>0.733 (0.709-0.757)</b> | <b>0.939 (0.930-0.948)</b> | <b>0.578 (0.521-0.636)</b> | <b>0.801 (0.778-0.825)</b> |
| 100%    | SL_ImageNet | 0.698 (0.673-0.723)***     | 0.910 (0.898-0.922)***     | 0.590 (0.539-0.641)        | 0.747 (0.722-0.773)***     |
|         | DINOv2      | 0.705 (0.681-0.729)***     | 0.923 (0.913-0.933)***     | 0.565 (0.506-0.624)**      | 0.774 (0.748-0.800)***     |
|         | SwAVDerm    | 0.683 (0.659-0.708)***     | 0.907 (0.895-0.918)***     | 0.479 (0.428-0.529)***     | 0.733 (0.707-0.758)***     |
|         | PanDerm     | <b>0.767 (0.742-0.791)</b> | <b>0.951 (0.944-0.959)</b> | <b>0.647 (0.602-0.692)</b> | <b>0.843 (0.822-0.864)</b> |

Supplementary Data Table 6: **Label efficiency generalization performance for dermoscopic image-based skin cancer diagnosis on BCN20000 dataset.** Metrics: W\_F1 (Weighted F1), AUROC, BACC (Balanced Accuracy), AUPR (Area Under Precision-Recall Curve). The best model for each setting is bolded. 95% CI in parentheses. \* $p < 0.05$ , \*\* $p < 0.01$ , \*\*\* $p < 0.001$  compared to PanDerm. P-values calculated using a two-sided t-test.

| Percent | Model       | W_F1                       | AUROC                      | BACC                       | AUPR                       |
|---------|-------------|----------------------------|----------------------------|----------------------------|----------------------------|
| 5%      | SL_ImageNet | 0.826 (0.802-0.851)        | 0.681 (0.593-0.769)*       | 0.548 (0.502-0.594)        | 0.329 (0.214-0.444)        |
|         | DINOV2      | 0.825 (0.798-0.853)        | 0.706 (0.620-0.791)        | 0.553 (0.502-0.605)        | 0.331 (0.219-0.444)*       |
|         | SwAVDerm    | 0.839 (0.812-0.866)        | 0.660 (0.567-0.754)*       | 0.572 (0.518-0.626)        | 0.355 (0.231-0.480)        |
|         | PanDerm     | <b>0.842 (0.811-0.874)</b> | <b>0.749 (0.663-0.834)</b> | <b>0.594 (0.534-0.654)</b> | <b>0.431 (0.299-0.562)</b> |
| 10%     | SL_ImageNet | <b>0.858 (0.829-0.888)</b> | 0.784 (0.708-0.861)        | 0.622 (0.556-0.688)        | 0.470 (0.345-0.595)        |
|         | DINOV2      | 0.853 (0.822-0.884)        | <b>0.798 (0.721-0.875)</b> | 0.626 (0.557-0.694)        | 0.461 (0.322-0.600)        |
|         | SwAVDerm    | 0.858 (0.826-0.889)        | 0.732 (0.647-0.816)        | <b>0.653 (0.581-0.725)</b> | 0.390 (0.263-0.517)        |
|         | PanDerm     | 0.857 (0.826-0.888)        | 0.795 (0.712-0.878)        | 0.652 (0.583-0.721)        | <b>0.480 (0.347-0.613)</b> |
| 20%     | SL_ImageNet | 0.847 (0.818-0.876)        | 0.802 (0.739-0.865)***     | 0.612 (0.545-0.679)*       | 0.458 (0.332-0.584)        |
|         | DINOV2      | <b>0.908 (0.879-0.937)</b> | 0.799 (0.726-0.833)        | <b>0.779 (0.708-0.851)</b> | <b>0.629 (0.500-0.758)</b> |
|         | SwAVDerm    | 0.841 (0.811-0.872)*       | 0.798 (0.724-0.872)**      | 0.607 (0.541-0.673)*       | 0.461 (0.333-0.589)        |
|         | PanDerm     | 0.879 (0.848-0.910)        | <b>0.885 (0.839-0.930)</b> | 0.718 (0.644-0.791)        | 0.573 (0.443-0.703)        |
| 30%     | SL_ImageNet | 0.851 (0.821-0.881)        | 0.851 (0.794-0.908)*       | 0.631 (0.561-0.701)*       | 0.506 (0.384-0.628)        |
|         | DINOV2      | 0.869 (0.837-0.902)        | 0.854 (0.794-0.914)*       | 0.709 (0.638-0.781)        | 0.580 (0.444-0.715)        |
|         | SwAVDerm    | <b>0.884 (0.854-0.915)</b> | 0.814 (0.745-0.883)**      | 0.679 (0.609-0.748)        | 0.508 (0.372-0.643)        |
|         | PanDerm     | 0.874 (0.842-0.906)        | <b>0.899 (0.858-0.939)</b> | <b>0.731 (0.657-0.805)</b> | <b>0.601 (0.465-0.737)</b> |
| 50%     | SL_ImageNet | 0.872 (0.842-0.903)        | 0.839 (0.778-0.899)**      | 0.679 (0.607-0.752)        | 0.524 (0.399-0.650)*       |
|         | DINOV2      | 0.882 (0.850-0.913)        | 0.831 (0.766-0.896)**      | 0.718 (0.644-0.793)        | 0.540 (0.403-0.677)*       |
|         | SwAVDerm    | 0.873 (0.841-0.904)        | 0.820 (0.757-0.883)**      | 0.687 (0.614-0.760)        | 0.515 (0.382-0.648)**      |
|         | PanDerm     | <b>0.890 (0.860-0.920)</b> | <b>0.915 (0.877-0.953)</b> | <b>0.750 (0.677-0.823)</b> | <b>0.688 (0.570-0.805)</b> |
| 100%    | SL_ImageNet | 0.873 (0.841-0.904)*       | 0.878 (0.823-0.933)**      | 0.681 (0.610-0.751)**      | 0.638 (0.524-0.752)*       |
|         | DINOV2      | 0.879 (0.848-0.911)*       | 0.877 (0.820-0.934)***     | 0.734 (0.659-0.808)        | 0.631 (0.507-0.754)*       |
|         | SwAVDerm    | 0.860 (0.828-0.891)***     | 0.848 (0.791-0.905)***     | 0.660 (0.590-0.731)**      | 0.538 (0.414-0.661)***     |
|         | PanDerm     | <b>0.912 (0.884-0.940)</b> | <b>0.949 (0.922-0.976)</b> | <b>0.774 (0.700-0.847)</b> | <b>0.771 (0.660-0.881)</b> |

Supplementary Data Table 7: **Label efficiency generalization performance for dermoscopic image-based melanoma detection on HIBA dataset.** Metrics: W\_F1 (Weighted F1), AUROC, BACC (Balanced Accuracy), AUPR (Area Under Precision-Recall Curve). The best model for each setting is bolded. 95% CI in parentheses. \* $p < 0.05$ , \*\* $p < 0.01$ , \*\*\* $p < 0.001$  compared to PanDerm. P-values calculated using a two-sided t-test.

| Percent | Model       | W_F1                       | AUROC                      | BACC                       | AUPR                       |
|---------|-------------|----------------------------|----------------------------|----------------------------|----------------------------|
| 5%      | SL_ImageNet | 0.693 (0.622-0.763)        | 0.689 (0.602-0.777)        | 0.630 (0.563-0.696)        | 0.591 (0.483-0.700)        |
|         | DINOv2      | 0.697 (0.632-0.762)        | 0.713 (0.625-0.801)        | 0.653 (0.580-0.726)        | 0.654 (0.546-0.762)        |
|         | SwAVDerm    | 0.589 (0.533-0.645)***     | 0.609 (0.519-0.700)        | 0.530 (0.475-0.585)***     | 0.478 (0.376-0.580)*       |
|         | PanDerm     | <b>0.707 (0.642-0.772)</b> | <b>0.674 (0.587-0.762)</b> | <b>0.655 (0.585-0.725)</b> | <b>0.595 (0.495-0.695)</b> |
| 10%     | SL_ImageNet | 0.677 (0.610-0.743)        | 0.693 (0.607-0.779)**      | 0.617 (0.551-0.683)        | 0.552 (0.444-0.660)*       |
|         | DINOv2      | 0.722 (0.655-0.788)        | 0.771 (0.697-0.845)        | 0.683 (0.611-0.755)        | 0.673 (0.568-0.777)        |
|         | SwAVDerm    | 0.609 (0.544-0.674)***     | 0.619 (0.526-0.712)***     | 0.550 (0.477-0.622)***     | 0.464 (0.367-0.560)***     |
|         | PanDerm     | <b>0.738 (0.674-0.802)</b> | <b>0.785 (0.714-0.856)</b> | <b>0.682 (0.612-0.753)</b> | <b>0.666 (0.556-0.777)</b> |
| 20%     | SL_ImageNet | 0.672 (0.610-0.734)*       | 0.738 (0.655-0.821)        | 0.608 (0.544-0.672)*       | 0.601 (0.487-0.716)        |
|         | DINOv2      | <b>0.747 (0.685-0.809)</b> | <b>0.791 (0.715-0.867)</b> | <b>0.694 (0.622-0.765)</b> | 0.662 (0.553-0.770)        |
|         | SwAVDerm    | 0.634 (0.572-0.697)**      | 0.641 (0.556-0.725)**      | 0.574 (0.508-0.640)**      | 0.489 (0.392-0.586)***     |
|         | PanDerm     | 0.731 (0.670-0.793)        | 0.765 (0.691-0.838)        | 0.672 (0.603-0.740)        | <b>0.668 (0.565-0.771)</b> |
| 30%     | SL_ImageNet | 0.714 (0.653-0.775)        | 0.772 (0.696-0.849)        | 0.654 (0.591-0.717)        | 0.662 (0.544-0.781)        |
|         | DINOv2      | 0.728 (0.663-0.794)        | 0.813 (0.746-0.879)        | <b>0.681 (0.609-0.753)</b> | 0.721 (0.629-0.813)        |
|         | SwAVDerm    | 0.636 (0.571-0.700)**      | 0.644 (0.555-0.733)***     | 0.577 (0.507-0.647)**      | 0.496 (0.390-0.602)***     |
|         | PanDerm     | <b>0.729 (0.666-0.792)</b> | <b>0.816 (0.751-0.882)</b> | 0.676 (0.604-0.748)        | <b>0.722 (0.628-0.817)</b> |
| 50%     | SL_ImageNet | 0.720 (0.655-0.785)        | 0.772 (0.703-0.842)        | 0.661 (0.593-0.730)        | 0.677 (0.574-0.781)        |
|         | DINOv2      | 0.726 (0.661-0.792)        | <b>0.810 (0.743-0.877)</b> | 0.675 (0.602-0.747)        | <b>0.722 (0.630-0.813)</b> |
|         | SwAVDerm    | 0.686 (0.617-0.755)        | 0.693 (0.610-0.775)**      | 0.635 (0.562-0.708)        | 0.541 (0.436-0.647)**      |
|         | PanDerm     | <b>0.741 (0.676-0.806)</b> | 0.804 (0.739-0.870)        | <b>0.687 (0.616-0.758)</b> | 0.716 (0.625-0.808)        |
| 100%    | SL_ImageNet | 0.754 (0.687-0.822)        | 0.810 (0.744-0.875)*       | 0.703 (0.632-0.774)        | 0.704 (0.595-0.813)*       |
|         | DINOv2      | 0.764 (0.699-0.829)        | 0.797 (0.723-0.870)**      | 0.723 (0.653-0.793)        | 0.733 (0.646-0.820)        |
|         | SwAVDerm    | 0.747 (0.686-0.809)        | 0.777 (0.702-0.853)**      | 0.696 (0.625-0.767)        | 0.660 (0.544-0.776)**      |
|         | PanDerm     | <b>0.802 (0.743-0.860)</b> | <b>0.878 (0.824-0.931)</b> | <b>0.767 (0.700-0.833)</b> | <b>0.799 (0.714-0.884)</b> |

Supplementary Data Table 8: **Label efficiency generalization performance for clinical image-based melanoma detection on DermC dataset.** Metrics: W\_F1 (Weighted F1), AUROC, BACC (Balanced Accuracy), AUPR (Area Under Precision-Recall Curve). The best model for each setting is bolded. 95% CI in parentheses. \* $p < 0.05$ , \*\* $p < 0.01$ , \*\*\* $p < 0.001$  compared to PanDerm. P-values calculated using a two-sided t-test.

| Percent | Model       | W_F1                       | AUROC                      | BACC                       | AUPR                       |
|---------|-------------|----------------------------|----------------------------|----------------------------|----------------------------|
| 5%      | SL_ImageNet | 0.566 (0.526-0.605)        | 0.803 (0.775-0.832)        | 0.395 (0.338-0.452)        | 0.598 (0.555-0.641)***     |
|         | DINOv2      | 0.560 (0.521-0.599)*       | 0.804 (0.776-0.833)        | 0.393 (0.354-0.432)***     | 0.607 (0.563-0.651)***     |
|         | SwAVDerm    | 0.468 (0.425-0.510)***     | 0.695 (0.661-0.729)***     | 0.328 (0.279-0.378)***     | 0.485 (0.442-0.528)***     |
|         | PanDerm     | <b>0.607 (0.569-0.646)</b> | <b>0.835 (0.808-0.861)</b> | <b>0.504 (0.432-0.576)</b> | <b>0.675 (0.636-0.715)</b> |
| 10%     | SL_ImageNet | 0.580 (0.540-0.621)***     | 0.824 (0.795-0.852)***     | 0.431 (0.375-0.487)**      | 0.630 (0.584-0.675)***     |
|         | DINOv2      | 0.598 (0.557-0.638)***     | 0.835 (0.810-0.861)***     | 0.432 (0.388-0.477)***     | 0.652 (0.608-0.695)***     |
|         | SwAVDerm    | 0.515 (0.474-0.556)***     | 0.753 (0.721-0.785)***     | 0.375 (0.317-0.433)***     | 0.550 (0.503-0.597)***     |
|         | PanDerm     | <b>0.673 (0.632-0.713)</b> | <b>0.877 (0.854-0.900)</b> | <b>0.560 (0.490-0.630)</b> | <b>0.733 (0.691-0.774)</b> |
| 20%     | SL_ImageNet | 0.601 (0.561-0.640)***     | 0.831 (0.803-0.858)***     | 0.486 (0.415-0.556)*       | 0.661 (0.616-0.705)***     |
|         | DINOv2      | 0.621 (0.581-0.661)**      | 0.843 (0.817-0.869)***     | 0.472 (0.408-0.536)***     | 0.678 (0.634-0.723)***     |
|         | SwAVDerm    | 0.535 (0.494-0.576)***     | 0.773 (0.742-0.805)***     | 0.398 (0.341-0.456)***     | 0.579 (0.535-0.623)***     |
|         | PanDerm     | <b>0.685 (0.645-0.726)</b> | <b>0.882 (0.860-0.904)</b> | <b>0.598 (0.526-0.670)</b> | <b>0.740 (0.699-0.781)</b> |
| 30%     | SL_ImageNet | 0.639 (0.597-0.681)***     | 0.854 (0.827-0.880)***     | 0.493 (0.426-0.560)***     | 0.702 (0.657-0.747)***     |
|         | DINOv2      | 0.636 (0.596-0.675)***     | 0.855 (0.830-0.880)***     | 0.477 (0.412-0.543)***     | 0.699 (0.658-0.740)***     |
|         | SwAVDerm    | 0.577 (0.532-0.621)***     | 0.806 (0.778-0.835)***     | 0.461 (0.390-0.532)***     | 0.624 (0.578-0.671)***     |
|         | PanDerm     | <b>0.729 (0.689-0.768)</b> | <b>0.910 (0.891-0.929)</b> | <b>0.645 (0.573-0.716)</b> | <b>0.791 (0.753-0.829)</b> |
| 50%     | SL_ImageNet | 0.634 (0.592-0.675)***     | 0.861 (0.835-0.887)***     | 0.544 (0.472-0.615)***     | 0.707 (0.663-0.752)***     |
|         | DINOv2      | 0.656 (0.614-0.698)***     | 0.867 (0.840-0.893)***     | 0.565 (0.494-0.636)***     | 0.716 (0.675-0.756)***     |
|         | SwAVDerm    | 0.595 (0.554-0.637)***     | 0.826 (0.798-0.854)***     | 0.490 (0.422-0.558)***     | 0.651 (0.607-0.695)***     |
|         | PanDerm     | <b>0.768 (0.730-0.806)</b> | <b>0.920 (0.900-0.939)</b> | <b>0.729 (0.665-0.793)</b> | <b>0.816 (0.777-0.854)</b> |
| 100%    | SL_ImageNet | 0.658 (0.617-0.699)***     | 0.878 (0.854-0.902)***     | 0.576 (0.504-0.649)***     | 0.747 (0.707-0.788)***     |
|         | DINOv2      | 0.695 (0.653-0.737)**      | 0.880 (0.855-0.905)***     | 0.575 (0.505-0.646)***     | 0.747 (0.706-0.787)***     |
|         | SwAVDerm    | 0.664 (0.624-0.704)***     | 0.858 (0.833-0.882)***     | 0.539 (0.473-0.606)***     | 0.709 (0.667-0.750)***     |
|         | PanDerm     | <b>0.758 (0.720-0.796)</b> | <b>0.931 (0.914-0.947)</b> | <b>0.710 (0.644-0.776)</b> | <b>0.844 (0.812-0.876)</b> |

Supplementary Data Table 9: **Label efficiency generalization performance for dermoscopic image-based skin condition classification on PAD dataset.** Metrics: W\_F1 (Weighted F1), AUROC, BACC (Balanced Accuracy), AUPR (Area Under Precision-Recall Curve). The best model for each setting is bolded. 95% CI in parentheses. \* $p < 0.05$ , \*\* $p < 0.01$ , \*\*\* $p < 0.001$  compared to PanDerm. P-values calculated using a two-sided t-test.

| Percent | Model       | W_F1                       | AUROC                      | BACC                       | AUPR                       |
|---------|-------------|----------------------------|----------------------------|----------------------------|----------------------------|
| 5%      | SL_ImageNet | 0.805 (0.799-0.812)***     | 0.984 (0.983-0.985)***     | 0.738 (0.711-0.765)***     | 0.886 (0.880-0.891)***     |
|         | DINOv2      | 0.835 (0.829-0.841)***     | 0.986 (0.985-0.987)***     | 0.756 (0.736-0.776)***     | 0.905 (0.900-0.909)***     |
|         | SwAVDerm    | 0.738 (0.731-0.745)***     | 0.968 (0.966-0.969)***     | 0.673 (0.647-0.698)***     | 0.806 (0.799-0.813)***     |
|         | PanDerm     | <b>0.867 (0.861-0.872)</b> | <b>0.991 (0.991-0.992)</b> | <b>0.844 (0.836-0.853)</b> | <b>0.931 (0.927-0.935)</b> |
| 10%     | SL_ImageNet | 0.831 (0.824-0.837)***     | 0.988 (0.987-0.988)***     | 0.789 (0.768-0.809)***     | 0.908 (0.903-0.913)***     |
|         | DINOv2      | 0.854 (0.848-0.860)***     | 0.989 (0.988-0.989)***     | 0.790 (0.764-0.816)***     | 0.916 (0.911-0.921)***     |
|         | SwAVDerm    | 0.773 (0.766-0.780)***     | 0.975 (0.974-0.976)***     | 0.704 (0.679-0.729)***     | 0.842 (0.835-0.849)***     |
|         | PanDerm     | <b>0.877 (0.872-0.882)</b> | <b>0.992 (0.992-0.993)</b> | <b>0.859 (0.850-0.867)</b> | <b>0.937 (0.933-0.941)</b> |
| 20%     | SL_ImageNet | 0.851 (0.845-0.857)***     | 0.990 (0.989-0.991)***     | 0.799 (0.772-0.826)***     | 0.924 (0.919-0.928)***     |
|         | DINOv2      | 0.869 (0.863-0.874)***     | 0.991 (0.990-0.991)***     | 0.812 (0.787-0.838)***     | 0.930 (0.926-0.935)***     |
|         | SwAVDerm    | 0.780 (0.774-0.787)***     | 0.977 (0.976-0.979)***     | 0.708 (0.687-0.729)***     | 0.854 (0.848-0.861)***     |
|         | PanDerm     | <b>0.884 (0.879-0.889)</b> | <b>0.993 (0.993-0.994)</b> | <b>0.874 (0.866-0.882)</b> | <b>0.945 (0.942-0.949)</b> |
| 30%     | SL_ImageNet | 0.862 (0.857-0.868)***     | 0.991 (0.990-0.991)***     | 0.803 (0.778-0.827)***     | 0.929 (0.925-0.934)***     |
|         | DINOv2      | 0.879 (0.873-0.884)***     | 0.992 (0.991-0.992)***     | 0.827 (0.801-0.852)*       | 0.937 (0.933-0.941)***     |
|         | SwAVDerm    | 0.793 (0.786-0.799)***     | 0.980 (0.978-0.981)***     | 0.710 (0.702-0.719)***     | 0.863 (0.857-0.870)***     |
|         | PanDerm     | <b>0.896 (0.891-0.901)</b> | <b>0.994 (0.993-0.994)</b> | <b>0.866 (0.841-0.891)</b> | <b>0.947 (0.943-0.951)</b> |
| 50%     | SL_ImageNet | 0.865 (0.859-0.871)***     | 0.991 (0.990-0.992)***     | 0.809 (0.784-0.833)***     | 0.931 (0.927-0.935)***     |
|         | DINOv2      | 0.885 (0.879-0.890)***     | 0.992 (0.991-0.993)***     | 0.821 (0.801-0.841)***     | 0.938 (0.934-0.942)***     |
|         | SwAVDerm    | 0.798 (0.792-0.805)***     | 0.981 (0.980-0.982)***     | 0.718 (0.709-0.727)***     | 0.871 (0.865-0.877)***     |
|         | PanDerm     | <b>0.900 (0.895-0.904)</b> | <b>0.994 (0.993-0.995)</b> | <b>0.872 (0.848-0.897)</b> | <b>0.948 (0.944-0.951)</b> |
| 100%    | SL_ImageNet | 0.869 (0.863-0.875)***     | 0.992 (0.991-0.992)***     | 0.829 (0.803-0.856)***     | 0.934 (0.930-0.938)***     |
|         | DINOv2      | 0.890 (0.885-0.895)***     | 0.993 (0.992-0.993)***     | 0.820 (0.813-0.828)***     | 0.942 (0.938-0.947)**      |
|         | SwAVDerm    | –                          | –                          | –                          | –                          |
|         | PanDerm     | <b>0.901 (0.896-0.905)</b> | <b>0.994 (0.993-0.994)</b> | <b>0.878 (0.854-0.902)</b> | <b>0.947 (0.943-0.950)</b> |

Supplementary Data Table 10: **Label efficiency generalization performance for fine-grained skin tumor classification on PATCH16 dataset.** Metrics: W\_F1 (Weighted F1), AUROC, BACC (Balanced Accuracy), AUPR (Area Under Precision-Recall Curve). The best model for each setting is bolded. 95% CI in parentheses. \* $p < 0.05$ , \*\* $p < 0.01$ , \*\*\* $p < 0.001$  compared to PanDerm. SwAVDerm results for the 100% setting are missing. P-values calculated using a two-sided t-test.

| Model       | Dataset | W_F1                        | AUROC                       | BACC                        | AUPR                        |
|-------------|---------|-----------------------------|-----------------------------|-----------------------------|-----------------------------|
| SL_Imagenet | MMT-09  | 0.661 (0.653, 0.668)***     | 0.860 (0.846, 0.874)***     | 0.404 (0.377, 0.430)***     | 0.482 (0.460, 0.503)***     |
| DINOv2      | MMT-09  | 0.672 (0.657, 0.687)***     | 0.858 (0.839, 0.877)***     | 0.433 (0.412, 0.454)***     | 0.474 (0.459, 0.490)***     |
| SwaVDerm    | MMT-09  | 0.624 (0.615, 0.634)***     | 0.814 (0.802, 0.825)***     | 0.356 (0.347, 0.365)***     | 0.411 (0.401, 0.422)***     |
| PanDerm     | MMT-09  | <b>0.704 (0.699, 0.709)</b> | <b>0.901 (0.888, 0.913)</b> | <b>0.462 (0.436, 0.488)</b> | <b>0.560 (0.539, 0.581)</b> |
| SL_Imagenet | MMT-74  | 0.417 (0.411, 0.423)***     | 0.822 (0.807, 0.836)***     | 0.119 (0.101, 0.138)***     | 0.144 (0.125, 0.162)***     |
| DINOv2      | MMT-74  | 0.414 (0.401, 0.428)***     | 0.842 (0.830, 0.853)***     | 0.115 (0.103, 0.127)***     | 0.146 (0.127, 0.165)***     |
| SwaVDerm    | MMT-74  | 0.349 (0.340, 0.358)***     | 0.774 (0.758, 0.790)***     | 0.085 (0.073, 0.098)***     | 0.105 (0.085, 0.124)***     |
| PanDerm     | MMT-74  | <b>0.488 (0.482, 0.494)</b> | <b>0.887 (0.872, 0.902)</b> | <b>0.174 (0.159, 0.189)</b> | <b>0.211 (0.186, 0.235)</b> |
| SL_Imagenet | DermNet | 0.497 (0.481, 0.512)***     | 0.885 (0.878, 0.892)***     | 0.462 (0.444, 0.480)***     | 0.426 (0.407, 0.444)***     |
| DINOv2      | DermNet | 0.536 (0.521, 0.551)***     | 0.902 (0.896, 0.909)***     | 0.505 (0.487, 0.523)***     | 0.476 (0.456, 0.496)***     |
| SwaVDerm    | DermNet | 0.474 (0.458, 0.490)***     | 0.884 (0.878, 0.891)***     | 0.442 (0.424, 0.460)***     | 0.428 (0.410, 0.446)***     |
| PanDerm     | DermNet | <b>0.619 (0.603, 0.634)</b> | <b>0.944 (0.939, 0.949)</b> | <b>0.586 (0.568, 0.603)</b> | <b>0.623 (0.603, 0.642)</b> |

Supplementary Data Table 11: **General multi-class skin condition classification performance of different models on MMT-09, MMT-74, and Dermnet datasets.** All models were evaluated on three datasets: MMT-09, MMT-74, and DermNet. Models include SL\_Imagenet (supervised learning on ImageNet), DINOv2, SwaVDerm, and PanDerm. Performance is reported using Weighted F1 score (W\_F1), Area Under the Receiver Operating Characteristic curve (AUROC), Balanced Accuracy (BACC), and Area Under the Precision-Recall curve (AUPR). The best-performing model for each metric and dataset is bolded. 95% CI is included in parentheses. \*\*\* $p < 0.001$  compared to PanDerm. P-values calculated using a two-sided t-test.

| Dataset | Model             | AUROC                      | Sensitivity                | Specificity                | BACC                       |
|---------|-------------------|----------------------------|----------------------------|----------------------------|----------------------------|
| DDI1P   | Default           | 0.596 (0.567-0.624)***     | 0.173 (0.141-0.205)***     | <b>0.969 (0.939-0.988)</b> | 0.571 (0.542-0.611)***     |
|         | w/ Warp           | 0.673 (0.643-0.702)***     | 0.533 (0.493-0.562)***     | 0.765 (0.735-0.794)***     | 0.649 (0.608-0.685)***     |
|         | w/ Mask           | 0.648 (0.629-0.662)***     | 0.600 (0.571-0.626)***     | 0.646 (0.617-0.675)***     | 0.623 (0.594-0.652)***     |
|         | w/ Whole pipeline | <b>0.706 (0.686-0.725)</b> | <b>0.653 (0.634-0.673)</b> | 0.741 (0.722-0.751)***     | <b>0.697 (0.688-0.717)</b> |
| DDI2P   | Default           | 0.683 (0.517-0.849)***     | <b>0.940 (0.864-1.000)</b> | 0.239 (0.115-0.593)***     | 0.590 (0.449-0.730)***     |
|         | w/ Warp           | 0.710 (0.579-0.841)***     | 0.942 (0.862-1.000)        | 0.273 (0.013-0.533)***     | 0.607 (0.506-0.709)***     |
|         | w/ Mask           | 0.695 (0.564-0.822)***     | 0.935 (0.853-0.995)        | 0.255 (0.012-0.511)***     | 0.595 (0.495-0.695)***     |
|         | w/ Whole pipeline | <b>0.767 (0.649-0.886)</b> | 0.854 (0.797-0.911)***     | <b>0.577 (0.387-0.768)</b> | <b>0.716 (0.621-0.810)</b> |

Supplementary Data Table 12: **Ablation study on pre-processing methods for short-term lesion change detection based on SDDI1P and SDDI2P datasets.** Metrics: AUROC, Sensitivity, Specificity, BACC (Balanced Accuracy). Warp denoted image registration, Mask denoted lesion segmentation, and the Whole pipeline denoted our proposed pre-processing pipeline. The best model is bolded and highlighted. 95% CI in parentheses. \* $p < 0.05$ , \*\* $p < 0.01$ , \*\*\* $p < 0.001$ . P-values calculated using a two-sided t-test.

| Dataset | Model       | AUROC                              | Sensitivity                        | Specificity                        | BACC                               |
|---------|-------------|------------------------------------|------------------------------------|------------------------------------|------------------------------------|
| SDDI1   | SL_Imagenet | 0.616 (0.599-0.634) <sup>***</sup> | 0.520 (0.501-0.543) <sup>***</sup> | 0.647 (0.628-0.669) <sup>***</sup> | 0.584 (0.567-0.613) <sup>***</sup> |
|         | DINOV2      | 0.660 (0.649-0.678) <sup>***</sup> | 0.573 (0.554-0.592) <sup>***</sup> | 0.601 (0.586-0.622) <sup>***</sup> | 0.587 (0.559-0.607) <sup>***</sup> |
|         | SwaVDerm    | 0.632 (0.614-0.652) <sup>***</sup> | 0.191 (0.163-0.214) <sup>***</sup> | <b>0.985 (0.961-0.999)</b>         | 0.588 (0.567-0.604) <sup>***</sup> |
|         | PanDerm     | <b>0.706 (0.686-0.725)</b>         | <b>0.653 (0.634-0.673)</b>         | 0.741 (0.722-0.751) <sup>***</sup> | <b>0.697 (0.688-0.717)</b>         |
| SDDI2   | SL_Imagenet | 0.715 (0.594-0.837)                | 0.870 (0.737-1.000)                | 0.392 (0.234-0.550)                | 0.631 (0.582-0.681)                |
|         | DINOV2      | 0.730 (0.533-0.928)                | 0.826 (0.673-0.979)                | <b>0.584 (0.160-1.000)</b>         | 0.705 (0.556-0.853)                |
|         | SwaVDerm    | 0.656 (0.547-0.764) <sup>*</sup>   | <b>0.970 (0.920-1.000)</b>         | 0.181 (0.051-0.412) <sup>**</sup>  | 0.575 (0.482-0.669) <sup>*</sup>   |
|         | PanDerm     | <b>0.767 (0.649-0.886)</b>         | 0.854 (0.797-0.911)                | 0.577 (0.387-0.768)                | <b>0.716 (0.621-0.810)</b>         |

Supplementary Data Table 13: **Short-term lesion change detection performance of different models on SDDI1 and SDDI2 datasets.** Models: SL\_Imagenet, DINOV2, SwaVDerm, and PanDerm. Metrics: AUROC, Sensitivity, Specificity, BACC (Balanced Accuracy). The best model is bolded and highlighted. 95% CI in parentheses. <sup>\*</sup> $p < 0.05$ , <sup>\*\*</sup> $p < 0.01$ , <sup>\*\*\*</sup> $p < 0.001$ . P-values calculated using a two-sided t-test.

| Dataset | Model       | AUROC                             | BACC                               |
|---------|-------------|-----------------------------------|------------------------------------|
| SDDI2M  | SL_Imagenet | 0.690 (0.580-0.800) <sup>**</sup> | 0.588 (0.435-0.740) <sup>***</sup> |
|         | DINOV2      | 0.665 (0.565-0.755) <sup>**</sup> | 0.614 (0.460-0.770) <sup>***</sup> |
|         | SwaVDerm    | 0.650 (0.558-0.742) <sup>**</sup> | 0.540 (0.429-0.762) <sup>***</sup> |
|         | PanDerm     | <b>0.840 (0.769-0.911)</b>        | <b>0.660 (0.472-0.848)</b>         |

Supplementary Data Table 14: **Malignant lesion change detection performance of different models on SDDI2 dataset.** classes: malignant lesion change vs others. Models: SL\_Imagenet, DINOV2, SwaVDerm, and PanDerm. Metrics: AUROC and BACC (Balanced Accuracy). The best model is bolded and highlighted. 95% CI in parentheses. <sup>\*</sup> $p < 0.05$ , <sup>\*\*</sup> $p < 0.01$ , <sup>\*\*\*</sup> $p < 0.001$ . P-values calculated using a two-sided t-test.

| Dataset                   | Model       | W_F1                             | AUROC                             | BACC                              | AUPR                               |
|---------------------------|-------------|----------------------------------|-----------------------------------|-----------------------------------|------------------------------------|
| Combinemel<br>(2 classes) | SL_Imagenet | 0.839 (0.781-0.897)              | 0.938 (0.898-0.978)               | 0.833 (0.767-0.899)               | 0.915 (0.867-0.964)                |
|                           | DINOV2      | 0.841 (0.780-0.901) <sup>*</sup> | 0.921 (0.872-0.971) <sup>**</sup> | 0.842 (0.778-0.907)               | 0.886 (0.823-0.949) <sup>***</sup> |
|                           | SwaVDerm    | 0.847 (0.790-0.904)              | 0.944 (0.905-0.983)               | 0.858 (0.796-0.920)               | 0.924 (0.876-0.962)                |
|                           | PanDerm     | <b>0.889 (0.837-0.941)</b>       | <b>0.964 (0.937-0.991)</b>        | <b>0.882 (0.822-0.942)</b>        | <b>0.944 (0.907-0.982)</b>         |
| Combinemel<br>(3 classes) | SL_Imagenet | 0.661 (0.598-0.725) <sup>*</sup> | 0.834 (0.789-0.879) <sup>**</sup> | 0.526 (0.429-0.624)               | 0.734 (0.694-0.773) <sup>*</sup>   |
|                           | DINOV2      | 0.632 (0.571-0.692) <sup>*</sup> | 0.833 (0.785-0.880) <sup>**</sup> | 0.474 (0.376-0.571) <sup>**</sup> | 0.728 (0.689-0.767) <sup>**</sup>  |
|                           | SwaVDerm    | 0.693 (0.633-0.744) <sup>*</sup> | 0.875 (0.832-0.917) <sup>*</sup>  | 0.601 (0.505-0.697)               | 0.775 (0.728-0.822)                |
|                           | PanDerm     | <b>0.721 (0.662-0.780)</b>       | <b>0.896 (0.860-0.932)</b>        | <b>0.624 (0.530-0.719)</b>        | <b>0.792 (0.746-0.838)</b>         |

Supplementary Data Table 15: **Metastasis prediction performance of different models on Combinemel dataset (2 classes and 3 classes).** 2 classes: metastasis vs control (no metastasis). 3 classes: local metastasis vs distant metastasis vs control. Models include SL\_Imagenet (supervised learning on ImageNet), DINOV2, SwaVDerm, and PanDerm. Metrics: Weighted F1 score (W\_F1), Area Under the Receiver Operating Characteristic curve (AUROC), Balanced Accuracy (BACC), and Area Under the Precision-Recall curve (AUPR). The best-performing model for each metric and dataset is bolded and highlighted. 95% CI in parentheses. Significance levels: <sup>\*</sup> $p < 0.05$ , <sup>\*\*</sup> $p < 0.01$ , <sup>\*\*\*</sup> $p < 0.001$ . P-values calculated using a two-sided t-test.

| Model                     | Metric  | 3-year                        | 5-year                        | 7-year                        |
|---------------------------|---------|-------------------------------|-------------------------------|-------------------------------|
| PanDerm_multi             | AUC     | 0.9463 (0.9004-0.9922)        | <b>0.9462 (0.9125-0.9799)</b> | <b>0.9303 (0.8953-0.9654)</b> |
|                           | p-value | 0.0000                        | 0.0000                        | 0.0000                        |
| Multi-clinical variables  | AUC     | 0.8819 (0.7960-0.9279)        | 0.9018 (0.8016-0.9420)        | 0.8587 (0.7997-0.9177)        |
|                           | p-value | 0.1601                        | 0.1521                        | 0.1475                        |
| Single clinical variables | AUC     | 0.8396 (0.7999-0.8793)        | 0.8473 (0.7859-0.9086)        | 0.8021 (0.7235-0.9007)        |
|                           | p-value | 0.0788                        | 0.0225                        | 0.0480                        |
| PanDerm_single            | AUC     | <b>0.9501 (0.9095-0.9908)</b> | 0.9312 (0.8868-0.9755)        | 0.9087 (0.8803-0.9371)        |
|                           | p-value | 0.4127                        | 0.0871                        | 0.0756                        |

Supplementary Data Table 16: **Survival analysis performance comparison between PanDerm and clinical variables on CombinMel dataset.** Methods include PanDerm\_multi, Multi-clinical variables, Single clinical variables, and PanDerm\_single. Metrics: Area Under the Time-dependent ROC Curve (AUC) at 3, 5, and 7 years with corresponding p-values. The best-performing model for each time point is bolded. 95% CI in parentheses. P-values calculated using a two-sided t-test.

| Model       | 3-year AUC                                  | 5-year AUC                                  | 7-year AUC                                  |
|-------------|---------------------------------------------|---------------------------------------------|---------------------------------------------|
| PanDerm     | <b>0.9501 (0.9095-0.9908)</b><br>p = 0.0000 | <b>0.9312 (0.8868-0.9755)</b><br>p = 0.0000 | <b>0.9087 (0.8803-0.9371)</b><br>p = 0.0000 |
| DINOV2      | 0.9276 (0.8903-0.9650)<br>p = 0.2901        | 0.9014 (0.8273-0.9754)<br>p = 0.3659        | 0.8836 (0.7981-0.9691)<br>p = 0.4613        |
| SwavDerm    | 0.9234 (0.8715-0.9754)<br>p = 0.2932        | 0.8824 (0.7943-0.9704)<br>p = 0.2066        | 0.8664 (0.7776-0.9552)<br>p = 0.2432        |
| SL_ImageNet | 0.9195 (0.8502-0.9889)<br>p = 0.3215        | 0.8858 (0.7977-0.9738)<br>p = 0.2370        | 0.8785 (0.7824-0.9747)<br>p = 0.4280        |

Supplementary Data Table 17: **Survival analysis performance comparison of different models on CombinMel dataset.** Models include PanDerm, DINOV2, SwavDerm, and SL\_ImageNet. Metrics: Area Under the Time-dependent ROC Curve (AUC) at 3, 5, and 7 years with corresponding p-values. The best-performing model for each time point is bolded. 95% CI in parentheses. P-values calculated using a two-sided t-test.

| Model       | Prediction head | Benign    |        |          | Malignant |              |          |
|-------------|-----------------|-----------|--------|----------|-----------|--------------|----------|
|             |                 | Precision | Recall | F1-score | Precision | Recall       | F1-score |
| SL_Imagenet | UD              | 0.999     | 0.943  | 0.971    | 0.007     | 0.464        | 0.015    |
|             | CLS             | 1.000     | 0.955  | 0.977    | 0.013     | 0.643        | 0.025    |
|             | CMB             | 1.000     | 0.921  | 0.959    | 0.008     | 0.679        | 0.015    |
|             | CMB_ML          | 1.000     | 0.883  | 0.938    | 0.006     | 0.821        | 0.013    |
| DINOv2      | UD              | 1.000     | 0.967  | 0.983    | 0.014     | 0.500        | 0.027    |
|             | CLS             | 1.000     | 0.954  | 0.977    | 0.013     | 0.679        | 0.026    |
|             | CMB             | 1.000     | 0.939  | 0.968    | 0.010     | 0.679        | 0.020    |
|             | CMB_ML          | 1.000     | 0.900  | 0.947    | 0.007     | 0.821        | 0.015    |
| SwavDerm    | UD              | 0.999     | 0.958  | 0.978    | 0.009     | 0.393        | 0.017    |
|             | CLS             | 1.000     | 0.961  | 0.980    | 0.012     | 0.500        | 0.023    |
|             | CMB             | 1.000     | 0.936  | 0.967    | 0.008     | 0.571        | 0.016    |
|             | CMB_ML          | 1.000     | 0.896  | 0.945    | 0.007     | 0.857        | 0.015    |
| PanDerm     | UD              | 1.000     | 0.943  | 0.971    | 0.009     | 0.571        | 0.018    |
|             | CLS             | 1.000     | 0.971  | 0.985    | 0.016     | 0.500        | 0.031    |
|             | CMB             | 1.000     | 0.928  | 0.962    | 0.009     | 0.714        | 0.018    |
|             | CMB_ML          | 1.000     | 0.887  | 0.940    | 0.007     | <b>0.893</b> | 0.014    |

Supplementary Data Table 18: **TBP-based Malignant lesion screening performance of different models and prediction head types on HOP&MYM dataset.** Malignant recall is the most crucial metrics. Results are shown for both benign and malignant classifications, including precision, recall, and F1-score.

| Dataset     | Model       | W_F1                       | AUROC                      | BACC                       | AUPR                       |
|-------------|-------------|----------------------------|----------------------------|----------------------------|----------------------------|
| Solardamage | SL_Imagenet | 0.890 (0.873-0.907)        | 0.950 (0.939-0.962)        | 0.829 (0.799-0.860)        | 0.899 (0.874-0.924)        |
|             | DINOv2      | 0.868 (0.849-0.888)        | 0.947 (0.935-0.958)        | 0.810 (0.779-0.840)        | 0.875 (0.847-0.903)        |
|             | SwaVDerm    | 0.888 (0.870-0.905)        | 0.958 (0.948-0.968)        | 0.826 (0.795-0.857)        | 0.908 (0.886-0.931)        |
|             | PanDerm     | <b>0.896 (0.879-0.913)</b> | <b>0.961 (0.951-0.971)</b> | <b>0.845 (0.816-0.874)</b> | <b>0.917 (0.893-0.940)</b> |

Supplementary Data Table 19: **Solar damage risk assessment performance of different models on HOP&MYM\_solar dataset.** 3 classes: low vs medium vs high risk. Models include SL\_Imagenet (supervised learning on ImageNet), DINOv2, SwaVDerm, and PanDerm. Metrics: Weighted F1 score (W\_F1), Area Under the Receiver Operating Characteristic curve (AUROC), Balanced Accuracy (BACC), and Area Under the Precision-Recall curve (AUPR). The best-performing model for each metric is bolded and highlighted. 95% CI in parentheses. P-values calculated using a two-sided t-test.

| Dataset | Model       | W_F1                       | AUROC                      | BACC                          | AUPR                       |
|---------|-------------|----------------------------|----------------------------|-------------------------------|----------------------------|
| MYM     | SL_Imagenet | 0.952 (0.950-0.954)***     | 0.979 (0.973-0.985)***     | 0.810 (0.803-0.817)***        | 0.836 (0.821-0.850)***     |
|         | DINOv2      | <b>0.956 (0.953-0.959)</b> | 0.980 (0.977-0.983)***     | <b>0.838 (0.825-0.851)***</b> | 0.834 (0.808-0.861)***     |
|         | SwaVDerm    | 0.944 (0.938-0.950)***     | 0.973 (0.969-0.978)***     | 0.774 (0.765-0.782)***        | 0.819 (0.799-0.839)***     |
|         | PanDerm     | 0.956 (0.953-0.958)        | <b>0.983 (0.979-0.987)</b> | 0.820 (0.799-0.842)           | <b>0.844 (0.820-0.868)</b> |

Supplementary Data Table 20: **Nevus counting performance of different models on a subset of MYM dataset.** Models include SL\_Imagenet (supervised learning on ImageNet), DINOv2, SwaVDerm, and PanDerm. Metrics: Weighted F1 score (W\_F1), Area Under the Receiver Operating Characteristic curve (AUROC), Balanced Accuracy (BACC), and Area Under the Precision-Recall curve (AUPR). The best-performing model for each metric is bolded and highlighted. 95% CI in parentheses. \*\*\* $p < 0.001$  compared to PanDerm. P-values calculated using a two-sided t-test.

| Model       | AUC                        | W-F1                       | BACC                       |
|-------------|----------------------------|----------------------------|----------------------------|
| SL-Imagenet | 68.09 (67.40-68.80)***     | 71.78 (71.27-72.33)***     | 62.09 (61.56-62.59)***     |
| DINOv2      | 67.83 (66.69-68.03)***     | 69.83 (68.92-70.34)***     | 59.40 (58.75-59.92)***     |
| SwavDerm    | 66.74 (66.22-67.10)***     | 68.15 (67.76-68.59)***     | 61.01 (60.53-61.49)***     |
| PanDerm     | <b>70.47 (69.76-71.15)</b> | <b>73.63 (62.74-73.92)</b> | <b>65.72 (65.13-66.28)</b> |

Supplementary Data Table 21: **Risk stratification performance of different models on HOP&MYM datasets.** The table shows the performance metrics for different models. Metrics include Area Under the Curve (AUC), Weighted F1 score (W-F1), and Balanced Accuracy (BACC). The best-performing model for each metric is bolded and highlighted. 95% CI in parentheses. All p-values < 0.001 (\*\*\*). P-values calculated using a two-sided t-test.

| Dataset  | Model   | DSC                         | JAC                         |
|----------|---------|-----------------------------|-----------------------------|
| ISIC2018 | MedSAM  | 0.904 (0.900-0.911)         | 0.841 (0.836-0.848)         |
|          | PanDerm | <b>0.910 (0.907-0.913)*</b> | <b>0.846 (0.842-0.850)*</b> |
| HAM10000 | MedSAM  | 0.949 (0.948-0.951)         | 0.905 (0.904-0.907)         |
|          | PanDerm | <b>0.949 (0.949-0.950)</b>  | <b>0.910 (0.908-0.917)</b>  |

Supplementary Data Table 22: **Lesion segmentation performance comparison of PanDerm and MedSAM on ISIC2018 and HAM10000 datasets.** Metrics: Dice Similarity Coefficient (DSC) and Jaccard Index (JAC). The best-performing model for each metric is bolded and highlighted. 95% CI in parentheses. Significance levels: \* $p < 0.05$ , \*\* $p < 0.01$ , \*\*\* $p < 0.001$ . For ISIC2018: DSC p-value = 0.017, JAC p-value = 0.025. For HAM10000: DSC p-value = 0.793, JAC p-value = 0.112. P-values calculated using a two-sided t-test.

| GPU     | Model   | Dataset  | Training Time | Inference Time |
|---------|---------|----------|---------------|----------------|
| A6000   | PanDerm | ISIC2018 | 2h 11min      | 52s            |
|         |         | HAM10000 | 6h 29min      | 59s            |
|         | MedSAM  | ISIC2018 | 8h 32min      | 2m 8s          |
|         |         | HAM10000 | 28h 57min     | 4m 4s          |
| RTX3090 | PanDerm | ISIC2018 | 2h 33min      | 46s            |
|         |         | HAM10000 | 7h 48min      | 1m 6s          |
|         | MedSAM  | ISIC2018 | 11h 58min     | 2m 16s         |
|         |         | HAM10000 | 38h 23min     | 4m 22s         |

Supplementary Data Table 23: **Training and inference times comparison between PanDerm and MedSAM on lesion segmentation.** The table shows the training and inference times for PanDerm and MedSAM on ISIC2018 and HAM10000 datasets, using A6000 and RTX3090 GPUs.

| Dataset  | Model       | DSC                        | JAC                        |
|----------|-------------|----------------------------|----------------------------|
| ISIC2018 | SL-Imagenet | 0.876 (0.870-0.887)***     | 0.807 (0.799-0.822)***     |
|          | autoSMIM    | 0.848 (0.845-0.851)***     | 0.769 (0.766-0.771)***     |
|          | BATFormer   | 0.884 (0.880-0.889)***     | 0.815 (0.809-0.823)***     |
|          | PanDerm     | <b>0.910 (0.907-0.913)</b> | <b>0.846 (0.842-0.850)</b> |

Supplementary Data Table 24: **Lesion segmentation performance of different models on ISIC2018 dataset.** Models include SL-Imagenet, autoSMIM, BATFormer, and PanDerm. Metrics: Dice Similarity Coefficient (DSC) and Jaccard Index (JAC). The best-performing model for each metric is bolded and highlighted. 95% CI in parentheses. Significance levels: \* $p < 0.05$ , \*\* $p < 0.01$ , \*\*\* $p < 0.001$ . P-values calculated using a two-sided t-test.

| Dataset  | Model       | DSC                        | JAC                        |
|----------|-------------|----------------------------|----------------------------|
| HAM10000 | SL-Imagenet | 0.927 (0.926-0.929)***     | 0.875 (0.873-0.878)***     |
|          | autoSMIM    | 0.920 (0.920-0.921)***     | 0.865 (0.864-0.866)***     |
|          | BATFormer   | 0.937 (0.935-0.939)***     | 0.891 (0.889-0.893)***     |
|          | PanDerm     | <b>0.949 (0.949-0.950)</b> | <b>0.910 (0.908-0.917)</b> |

Supplementary Data Table 25: **Lesion segmentation performance of different models on HAM10000 dataset.** Models include SL-Imagenet, autoSMIM, BATFormer, and PanDerm. Metrics: Dice Similarity Coefficient (DSC) and Jaccard Index (JAC). The best-performing model for each metric is bolded and highlighted. 95% CI in parentheses. Significance levels:  $*p < 0.05$ ,  $**p < 0.01$ ,  $***p < 0.001$ . P-values calculated using a two-sided t-test.

| Experience Group | Without AI       | With AI                    | p-value | Corrected p-value |
|------------------|------------------|----------------------------|---------|-------------------|
| Low              | 0.64 (0.58-0.70) | <b>0.83 (0.78-0.88)**</b>  | 0.0082  | 0.0246            |
| Medium           | 0.67 (0.62-0.72) | <b>0.79 (0.75-0.83)***</b> | <0.0001 | <0.0001           |
| High             | 0.78 (0.75-0.81) | <b>0.84 (0.82-0.86)**</b>  | 0.0390  | 0.1170            |

Supplementary Data Table 26: **Performance by experience level on human-AI collaboration study.** Comparison of accuracy with and without AI assistance for each experience group. Statistical significance was determined using paired two-sided t-tests with Bonferroni correction for multiple comparisons. 95% CI in parentheses.  $*p < 0.05$ ,  $**p < 0.01$ ,  $***p < 0.001$  (Bonferroni corrected) compared to performance without AI assistance.

| Class | Without AI       | With AI                    | p-value | Corrected p-value |
|-------|------------------|----------------------------|---------|-------------------|
| AKIEC | 0.51 (0.44-0.59) | <b>0.67 (0.60-0.74)**</b>  | 0.0036  | 0.0254            |
| BCC   | 0.76 (0.69-0.82) | <b>0.84 (0.79-0.90)</b>    | 0.0545  | 0.3812            |
| BKL   | 0.57 (0.50-0.65) | <b>0.77 (0.71-0.84)***</b> | 0.0001  | 0.0007            |
| DF    | 0.70 (0.63-0.77) | <b>0.81 (0.75-0.87)*</b>   | 0.0151  | 0.1059            |
| MEL   | 0.69 (0.64-0.74) | <b>0.83 (0.79-0.87)***</b> | <0.0001 | 0.0003            |
| NV    | 0.83 (0.79-0.86) | <b>0.86 (0.82-0.89)</b>    | 0.1948  | 1.0000            |
| VASC  | 0.93 (0.90-0.97) | <b>0.95 (0.92-0.98)</b>    | 0.4799  | 1.0000            |

Supplementary Data Table 27: **Class-specific performance comparison on human-AI collaboration study.** Comparison of accuracy with and without AI assistance for each class. Statistical significance was determined using paired two-sided t-tests with Bonferroni correction for multiple comparisons. 95% CI in parentheses.  $*p < 0.05$ ,  $**p < 0.01$ ,  $***p < 0.001$  compared to performance without AI assistance.

| Study                             | Mean Recall  | Recall_Mel   | Recall_BCC   |
|-----------------------------------|--------------|--------------|--------------|
| Tschandl et al. 2019 <sup>?</sup> | 0.777        | 0.614        | 0.796        |
| PanDerm                           | <b>0.804</b> | <b>0.877</b> | <b>0.860</b> |

Supplementary Data Table 28: **Performance comparison with prior Human-AI collaboration work in HAM10000.** Comparison of model performance between PanDerm and <sup>?</sup> on HAM10000 dataset. PanDerm shows improvements in overall recall (+2.72%) and particularly significant gains for critical cancers like melanoma (+26.32%) and BCC (+6.42%).

| Condition             | Accuracy                    |
|-----------------------|-----------------------------|
| Without AI assistance | 0.69 (0.65-0.73)            |
| With AI assistance    | <b>0.80 (0.76-0.84)</b> *** |

Supplementary Data Table 29: **Human AI collaboration performance comparison on skin cancer classification using HAM10000 dataset.** Comparison of accuracy with and without AI assistance. 95% CI in parentheses. \*\*\* $p = 6.53 \times 10^{-8}$  compared to performance without AI assistance. P-values calculated using a two-sided t-test.

| Dataset | Skin Tone          | W_F1                | Sensitivity         |
|---------|--------------------|---------------------|---------------------|
| F17K    | FST I-II (n=1195)  | 0.825 (0.825-0.825) | 0.835 (0.835-0.835) |
|         | FST III-IV (n=786) | 0.840 (0.840-0.840) | 0.851 (0.851-0.851) |
|         | FST V-VI (n=238)   | 0.864 (0.864-0.864) | 0.878 (0.878-0.878) |
| DDI     | FST I-II (n=40)    | 0.780 (0.780-0.780) | 0.750 (0.750-0.750) |
|         | FST III-IV (n=59)  | 0.818 (0.818-0.818) | 0.814 (0.814-0.814) |
|         | FST V-VI (n=38)    | 0.854 (0.854-0.854) | 0.842 (0.842-0.842) |

Supplementary Data Table 30: **PanDerm performance across different skin tones on Fitzpatrick17k and DDI datasets.** The table shows the performance metrics for PanDerm on F17K and DDI datasets, stratified by Fitzpatrick Skin Type (FST) groups. Metrics include Weighted F1 score (W\_F1) and Sensitivity. 95% CI in parentheses (identical to point estimate due to single measurement).

| Category | Subgroup        | n     | W_F1  | Sensitivity |
|----------|-----------------|-------|-------|-------------|
| Overall  | All             | 1232  | 0.957 | 0.959       |
| Sex      | Female          | 563   | 0.963 | 0.965       |
|          | Male            | 659   | 0.951 | 0.953       |
| Location | Face            | 70    | 0.862 | 0.871       |
|          | Lower extremity | 240   | 0.968 | 0.971       |
|          | Abdomen         | 126   | 0.984 | 0.984       |
|          | Upper extremity | 120   | 0.967 | 0.967       |
|          | Back            | 256   | 0.919 | 0.922       |
|          | Trunk           | 259   | 0.993 | 0.992       |
|          | Scalp           | 8     | 1.000 | 1.000       |
|          | Hand            | 18    | 1.000 | 1.000       |
|          | Unknown         | 40    | 1.000 | 1.000       |
|          | Chest           | 33    | 0.879 | 0.879       |
|          | Neck            | 18    | 1.000 | 1.000       |
|          | Foot            | 30    | 0.950 | 0.967       |
| Genital  | 8               | 1.000 | 1.000 |             |
| Age      | Old             | 517   | 0.923 | 0.927       |
|          | Medium          | 669   | 0.984 | 0.984       |
|          | Young           | 34    | 0.913 | 0.941       |

Supplementary Data Table 31: **Model robustness analysis across subgroups on HAM10000 dataset.** The table shows performance metrics across different subgroups based on sex, location, and age. Metrics include sample size (n), Weighted F1 score (W\_F1), and Sensitivity. All metric values are point estimates.

| <b>Characteristic</b>            | <b>n (%) or Mean <math>\pm</math> SD</b> |
|----------------------------------|------------------------------------------|
| <b>Total Participants</b>        |                                          |
| Total                            | 193                                      |
| <b>Age</b>                       |                                          |
| Age (years)                      | 52.2 $\pm$ 12.0                          |
| <b>Sex</b>                       |                                          |
| Female                           | 82 (42.5%)                               |
| Male                             | 111 (58.5%)                              |
| <b>Ancestry/Ethnicity</b>        |                                          |
| European/British                 | 164 (85.0%)                              |
| Mixed/Other                      | 29 (15.0%)                               |
| <b>Skin Phototype</b>            |                                          |
| Burns easily, tans slightly      | 52 (26.9%)                               |
| Burns moderately, tans gradually | 123 (63.7%)                              |
| Rarely burns, tans well          | 18 (9.3%)                                |
| <b>Innate Skin Color</b>         |                                          |
| Fair/Type I                      | 144 (74.6%)                              |
| Medium/Type II                   | 48 (24.9%)                               |
| Olive/Type III                   | 1 (0.5%)                                 |

Supplementary Data Table 32: Demographic characteristics of MYM cohort.

| <b>Characteristic</b>           | <b>N (%) or Mean <math>\pm</math> SD</b> |
|---------------------------------|------------------------------------------|
| <b>Sample Size</b>              |                                          |
| Total                           | 314                                      |
| <b>Age</b>                      |                                          |
| Age (years)                     | 56.1 $\pm$ 12.8                          |
| <b>Sex</b>                      |                                          |
| Male                            | 120 (38.2%)                              |
| Female                          | 194 (61.8%)                              |
| <b>Ancestry</b>                 |                                          |
| European/British                | 297 (94.6%)                              |
| Other/Mixed                     | 17 (5.4%)                                |
| <b>Birth Place</b>              |                                          |
| Australia                       | 268 (85.4%)                              |
| Overseas                        | 46 (14.6%)                               |
| <b>Melanoma History</b>         |                                          |
| Yes                             | 304 (96.8%)                              |
| No                              | 10 (3.2%)                                |
| <b>Non-melanoma Skin Cancer</b> |                                          |
| Yes                             | 195 (62.1%)                              |
| No                              | 119 (37.9%)                              |
| <b>Innate Skin Color</b>        |                                          |
| Fair/Type I                     | 269 (85.7%)                              |
| Medium/Type II                  | 44 (14.0%)                               |
| Olive/Type III                  | 1 (0.3%)                                 |

Supplementary Data Table 33: Demographic and clinical characteristics of HOP cohort.

| <b>Characteristic</b>                    | <b>N (%)</b> |
|------------------------------------------|--------------|
| <b>Total Participants</b>                | 54           |
| <b>Study Sites</b>                       |              |
| QLD 1 - PAH                              | 26 (48.1)    |
| NSW 3 - MIA                              | 28 (51.9)    |
| <b>Age (years)</b>                       |              |
| Range                                    | 19-75        |
| Mean                                     | 53.4         |
| <b>Gender</b>                            |              |
| Male                                     | 31 (57.4)    |
| Female                                   | 23 (42.6)    |
| <b>Melanoma Risk Group</b>               |              |
| Very High                                | 44 (81.5)    |
| High                                     | 8 (14.8)     |
| Low/Average                              | 1 (1.9)      |
| Unknown                                  | 1 (1.9)      |
| <b>Primary Diagnosis (Pathologist 1)</b> |              |
| Total Naevi                              | 37 (68.5)    |
| Common/Dermal/Congenital                 | 14 (25.9)    |
| Dysplastic Compound                      | 22 (40.7)    |
| Dysplastic Junctional                    | 8 (14.8)     |
| Total Melanomas                          | 13 (24.1)    |
| In Situ                                  | 11 (20.4)    |
| Thin Invasive                            | 2 (3.7)      |
| Other Lesions                            | 4 (7.4)      |
| <b>Number of Lesions per Patient</b>     |              |
| 1                                        | 36 (66.7)    |
| 2                                        | 12 (22.2)    |
| 3                                        | 2 (3.7)      |
| 4                                        | 2 (3.7)      |
| 5                                        | 2 (3.7)      |

Supplementary Data Table 34: Demographic characteristics of the ACEMID\_pilot\_study dataset.

| <b>Characteristic</b>                   | <b>N (%)</b> |
|-----------------------------------------|--------------|
| <b>Total Participants</b>               | 1254         |
| <b>Age (years)</b>                      |              |
| Mean                                    | 47.22        |
| Median                                  | 46           |
| Range                                   | 11-88        |
| <b>Sex</b>                              |              |
| Male                                    | 602 (48.0)   |
| Female                                  | 652 (52.0)   |
| <b>Melanoma History</b>                 |              |
| Personal history of melanoma            | 589 (47.0)   |
| No personal history of melanoma         | 665 (53.0)   |
| <b>Facultative Skin Colour (n=1245)</b> |              |
| Fair/Type 1                             | 635 (51.0)   |
| Medium/Type 2                           | 510 (41.0)   |
| Olive/Type 3                            | 100 (8.0)    |
| <b>Self-reported Ancestry*</b>          |              |
| British/Irish                           | 963          |
| West/Northern European                  | 228          |
| No data or other (not specified)        | 104          |
| Southern European                       | 36           |
| Eastern European                        | 23           |
| Asian                                   | 18           |
| Middle Eastern                          | 8            |
| Other (specified)                       | 8            |
| Indigenous Australian                   | 4            |
| Pacific Islander                        | 4            |

Supplementary Data Table 35: Demographic characteristics of the NSSI dataset.

\* Multiple ancestries could be reported by each participant

| Hyper-parameter                | Value    |
|--------------------------------|----------|
| Teacher model                  | CLIP     |
| First input size               | 224      |
| Second input size              | 196      |
| Second interpolation           | bicubic  |
| Number of output dimensions    | 768      |
| Crop min size                  | 0.4      |
| Crop max size                  | 1        |
| Patch size                     | 16       |
| Vocabulary size                | 8000     |
| Batch size                     | 480      |
| Learning rate                  | 1.5e-3   |
| Warmup epochs                  | 20       |
| Total epochs                   | 500      |
| Gradient clipping max norm     | 3.0      |
| Layer scale init value         | 1e-5     |
| Color jitter                   | 0.4      |
| Drop path                      | 0.2      |
| Mask generator                 | block    |
| Number of mask patches         | 118      |
| Decoder layer scale init value | 1e-5     |
| Regressor depth                | 4        |
| Decoder depth                  | 0        |
| Decoder embed dimension        | 1024     |
| Decoder number of heads        | 16       |
| Align loss weight              | 0        |
| Latent alignment loss weight   | 1        |
| Number of GPUs                 | 4        |
| Distributed launch             | torchrun |
| Processes per node             | 4        |

Supplementary Data Table 36: **PanDerm hyperparameters used in pretraining.** 4 × 80GB NVIDIA H100 GPUs were used for pretraining.

| Hyperparameter | Value |
|----------------|-------|
| Batch size     | 256   |
| Epochs         | 50    |
| learning rate  | 5e-4  |
| Layer decay    | 0.75  |
| Weight decay   | 0.05  |
| Drop path      | 0.2   |
| Reprob         | 0.25  |
| Mixup          | 0.8   |
| Cutmix         | 1.0   |

Supplementary Data Table 37: **PanDerm hyperparameters used in finetuning.** A single 49GB NVIDIA 6000Ada GPU was used for downstream finetuning.

| <b>Major Category</b>                         | <b>Classes</b>                                                                                                                                                                                                                                                                                                                                                                                              |
|-----------------------------------------------|-------------------------------------------------------------------------------------------------------------------------------------------------------------------------------------------------------------------------------------------------------------------------------------------------------------------------------------------------------------------------------------------------------------|
| <b>Skin Cancer and High-Risk Lesions (13)</b> | Basal Cell Carcinoma - Nodular, Basal Cell Carcinoma - Superficial, Basal Cell Carcinoma - Pigmented, Basal Cell Carcinoma - Recurrent, Melanoma - Nodular, Lentigo Maligna, Squamous Cell Carcinoma - Common, Squamous Cell Carcinoma - Bowen's, Keratoacanthoma, Actinic Keratosis - Common, Actinic Keratosis - Hypertrophic, Actinic Keratosis - Pigmented, Actinic Cheilitis                           |
| <b>Melanocytic Lesions (22)</b>               | Compound Nevus, Junctional Nevus, Dermal Nevus, Acral Parallel Pattern Nevus, Acral Lattice Pattern Nevus, Acral Untyped Pattern Nevus, Blue Nevus, Spitz Nevus, Reed Nevus, Congenital Nevus, Halo Nevus, Agminated Nevus, Atypical Nevus, Solar Lentigo, Lentigo Simplex, Ink-spot Lentigo, Ephelides, Melanosis, En Cocarde Nevus, Lentiginous Nevus, Subungual Melanocytic Nevus, Nevus with Regression |
| <b>Common Benign Growths (13)</b>             | Seborrheic Keratosis - Common, Seborrheic Keratosis - Inflamed, Seborrheic Keratosis - Pigmented, Dermatofibroma, Epidermal Cyst, Sebaceous Hyperplasia, Skin Tag, Fibrous Papule of Face, Cutaneous Horn, Comedone, Accessory Nipple, Myxoid Cyst, Chondrodermatitis                                                                                                                                       |
| <b>Inflammatory Conditions (8)</b>            | Psoriasis, Eczema, Dermatitis, Folliculitis, Granuloma Annulare, Lichenoid Dermatitis, Porokeratosis, Hypertrophic Lichen Planus                                                                                                                                                                                                                                                                            |
| <b>Vascular and Infectious Lesions (10)</b>   | Angiokeratoma, Angioma, Telangiectasia, Hematoma - Common, Hematoma - Subcorneal, Hematoma - Subungual, Molluscum Contagiosum, Wart, Vascular Malformation, Pyogenic Granuloma                                                                                                                                                                                                                              |
| <b>Others (8)</b>                             | Post-inflammatory Changes, Nail Dystrophy, Hypertrophic Scar, Atrophic Scar, Excoriation, Traumatic Changes, Striae, Chemical Burn                                                                                                                                                                                                                                                                          |

Supplementary Data Table 38: The taxonomy of 74 dermatological conditions covered in MMT-74 dataset.

| <b>Characteristic</b>             | <b>Melanoma N (%)</b> | <b>Benign N (%)</b> |
|-----------------------------------|-----------------------|---------------------|
| <b>Gender</b>                     |                       |                     |
| Male                              | 48 (53.9)             | 36 (40.0)           |
| Female                            | 41 (46.1)             | 54 (60.0)           |
| <b>Previous melanoma</b>          |                       |                     |
| Previous melanoma                 | 67 (75.2)             | 57 (63.3)           |
| Previous NMSC                     | 44 (49.4)             | 20 (22.2)           |
| Family history of melanoma        | 49 (55.0)             | 38 (42.2)           |
| <b>Naevi count</b>                |                       |                     |
| <20                               | 0 (0.0)               | 0 (0.0)             |
| 20-50                             | 3 (3.4)               | 1 (1.1)             |
| 50-100                            | 27 (30.3)             | 15 (16.7)           |
| 100-200                           | 14 (15.7)             | 33 (36.7)           |
| 200-500                           | 42 (47.2)             | 39 (43.3)           |
| >500                              | 3 (3.4)               | 2 (2.2)             |
| <b>Atypical Naevi count</b>       |                       |                     |
| <5                                | 19 (21.3)             | 22 (24.4)           |
| 5-15                              | 28 (31.5)             | 29 (32.2)           |
| >15                               | 42 (47.2)             | 39 (43.0)           |
| <b>Fitzpatrick Skin Phototype</b> |                       |                     |
| I                                 | 12 (13.4)             | 11 (12.2)           |
| II                                | 42 (47.1)             | 47 (52.2)           |
| III                               | 28 (31.4)             | 32 (35.6)           |
| IV                                | 0 (0.0)               | 0 (0.0)             |
| V                                 | 7 (7.8)               | 0 (0.0)             |
| <b>Location</b>                   |                       |                     |
| Head and neck                     | 7 (7.8)               | 7 (7.8)             |
| Chest                             | 9 (10.1)              | 9 (10.0)            |
| Abdomen                           | 7 (7.8)               | 14 (15.6)           |
| Back                              | 21 (23.5)             | 23 (25.6)           |
| Upper limb                        | 19 (21.3)             | 13 (14.4)           |
| Lower limb                        | 26 (29.2)             | 24 (26.7)           |
| <b>Histopathology (Melanoma)</b>  |                       |                     |
| In situ unspecified               | 16 (18.0)             | –                   |
| In situ SSM                       | 28 (31.4)             | –                   |
| Lentigo maligna                   | 11 (12.3)             | –                   |
| Invasive SSM                      | 32 (36.0)             | –                   |
| Invasive LMM                      | 2 (2.2)               | –                   |
| <b>Histopathology (Benign)</b>    |                       |                     |
| Dysplastic naevus                 | –                     | 36 (40.0)           |
| Compound naevus                   | –                     | 25 (27.8)           |
| Junctional naevus                 | –                     | 17 (18.9)           |
| Intradermal naevus                | –                     | 8 (8.9)             |
| Other                             | –                     | 4 (4.4)             |

Supplementary Data Table 39: Demographic characteristics of the SDDI-Alfred dataset.

| <b>Characteristic</b>     | <b>N (%)</b> |
|---------------------------|--------------|
| <b>Age</b>                |              |
| > 60 years                | 190 (51.4)   |
| ≤ 60 years                | 180 (48.6)   |
| <b>Sex</b>                |              |
| Female                    | 172 (47.3)   |
| Male                      | 198 (53.5)   |
| <b>Stage at Diagnosis</b> |              |
| Stage I                   | 261 (70.5)   |
| Stage II                  | 45 (12.2)    |
| Stage III                 | 61 (16.5)    |
| Stage IV                  | 3 (0.8)      |
| <b>T Classification</b>   |              |
| T1a                       | 193 (59.2)   |
| T1b                       | 28 (8.6)     |
| T2a                       | 56 (18.6)    |
| T2b                       | 13 (4.0)     |
| T3a                       | 21 (6.4)     |
| T3b                       | 11 (3.4)     |
| T4a                       | 7 (2.1)      |
| T4b                       | 42 (13.2)    |
| Unknown                   | 1 (0.3)      |
| <b>SLNB Status</b>        |              |
| Not Performed             | 265 (71.6)   |
| Positive                  | 40 (10.8)    |
| Negative                  | 65 (17.6)    |
| <b>N Classification</b>   |              |
| N1                        | 40 (10.8)    |
| N2                        | 14 (3.8)     |
| N3                        | 7 (1.8)      |
| Unknown                   | 2 (0.5)      |

Supplementary Data Table 40: Demographic characteristics of the CombinMel dataset.
